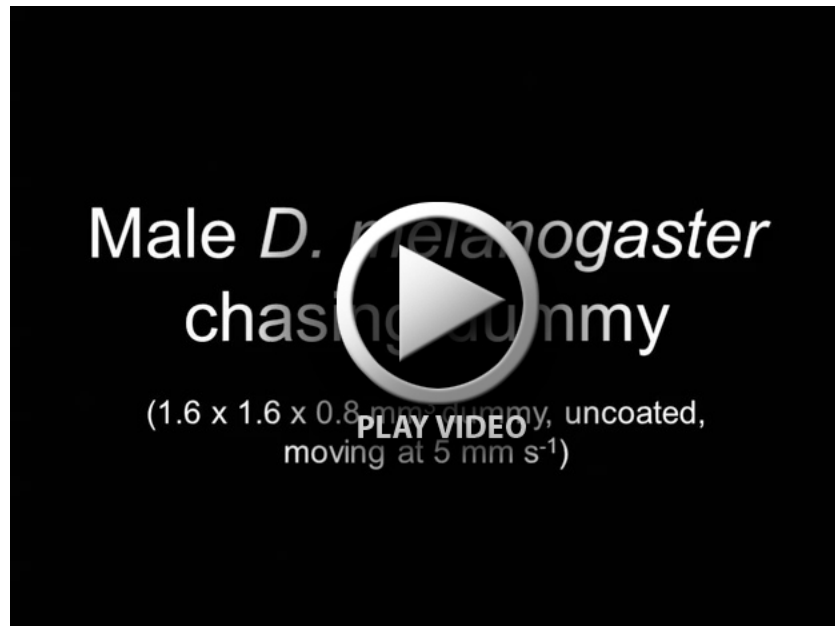

**Movie 1. Male *D. melanogaster* chasing dummy.** Videos of three example chases are provided. All chases are with a  $1.6 \times 1.6 \times 0.8 \text{ mm}^3$  dummy moving at  $5 \text{ mm s}^{-1}$ .

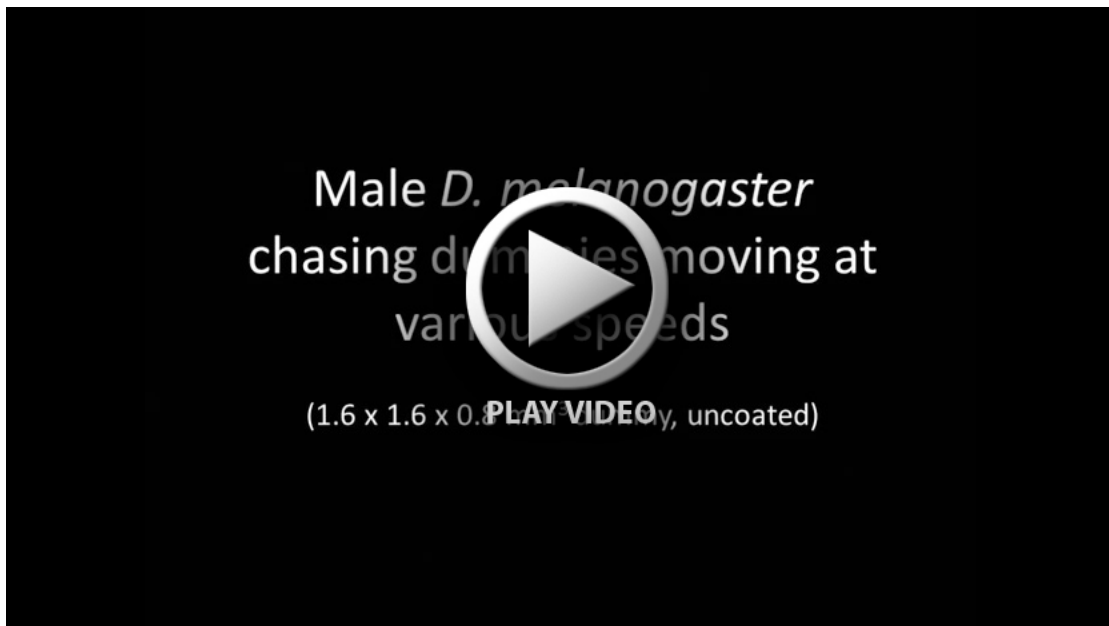

**Movie 2. Male *D. melanogaster* chasing dummies moving at various speeds.** Videos of three example chases are provided for the fastest and slowest dummy speed tested. All chases are with a  $1.6 \times 1.6 \times 0.8 \text{ mm}^3$  dummy. The first three chases are with the dummy moving at its slowest speed,  $1 \text{ mm s}^{-1}$ . The second three chases are with the dummy moving at its fastest speed,  $13.4 \text{ mm s}^{-1}$ .
